# Supplementary material
Source: HighWire-hosted journal article supplement (http://jneurosci.org/highwire/filestream/600379/field_highwire_adjunct_files/4/fig_5.pdf)

correlation coefficients of normalized path length of each node with IQ sub-scales

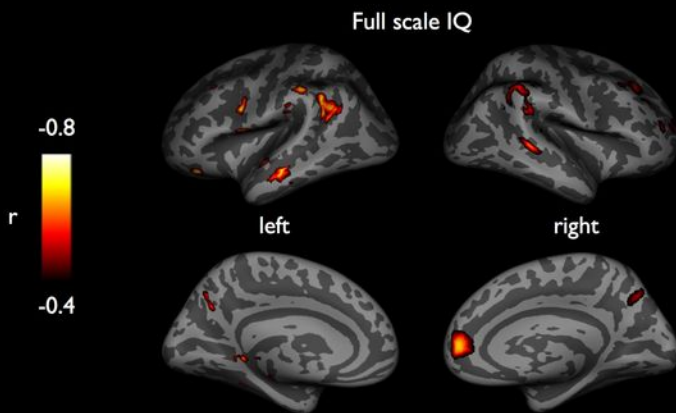

VIQ

VCI

WMI

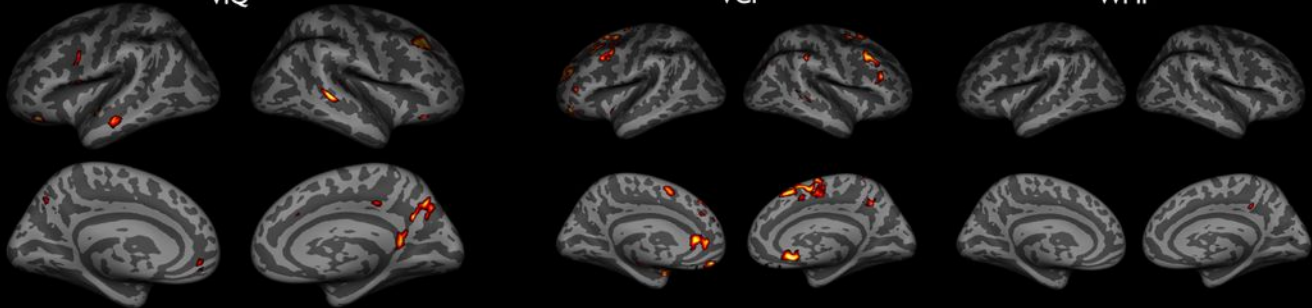

PIQ

POI

PSI

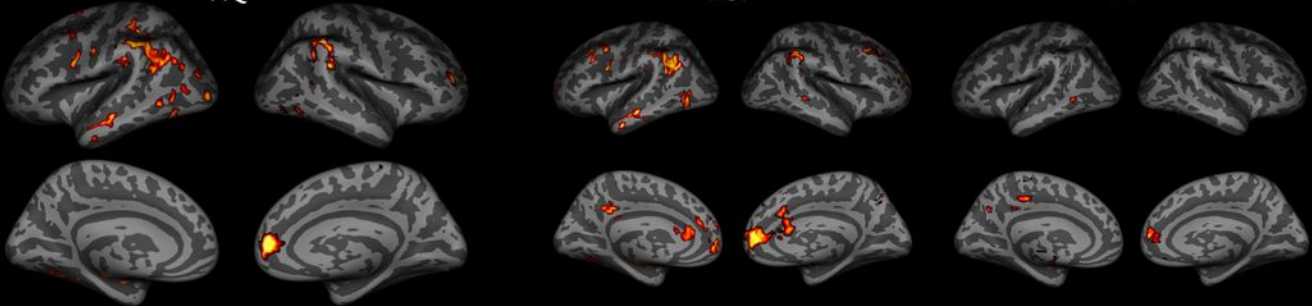

Supplement: fig_5.pdf [file fig_5.pdf]
